# Supplementary material for: Protein Lactylation and Metabolic Regulation of the Zoonotic Parasite Toxoplasma gondii
Source: PubMed Central journal article supplement (PMC11082259; doi:10.1016/j.gpb.2022.09.010), 2022-10-07

A

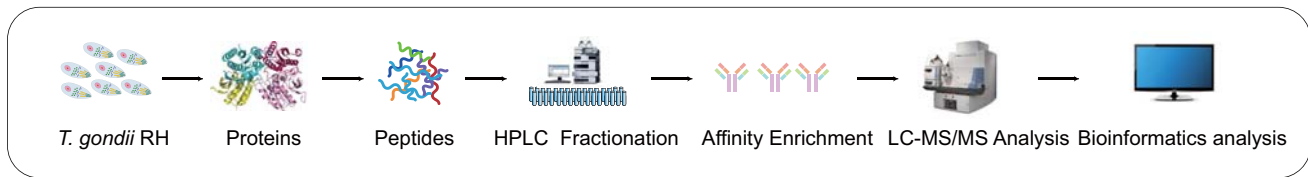

B

Peptide mass tolerance distribution

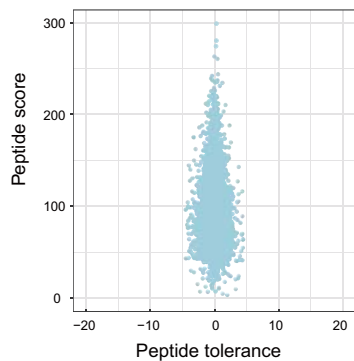

C

Identified peptide length distribution

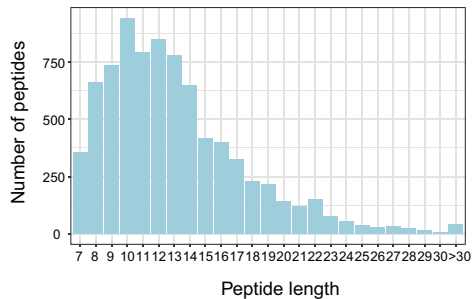

D

Number of sites in proteins

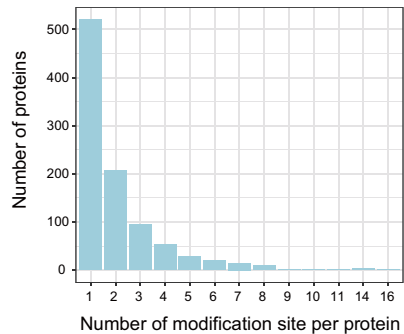

Supplement: mmc1.pdf [file mmc1.pdf]
