# Supplementary material for: Protein Lactylation and Metabolic Regulation of the Zoonotic Parasite Toxoplasma gondii
Source: PubMed Central journal article supplement (PMC11082259; doi:10.1016/j.gpb.2022.09.010), 2022-10-07
Supplement: mmc4.pdf [file mmc4.pdf]

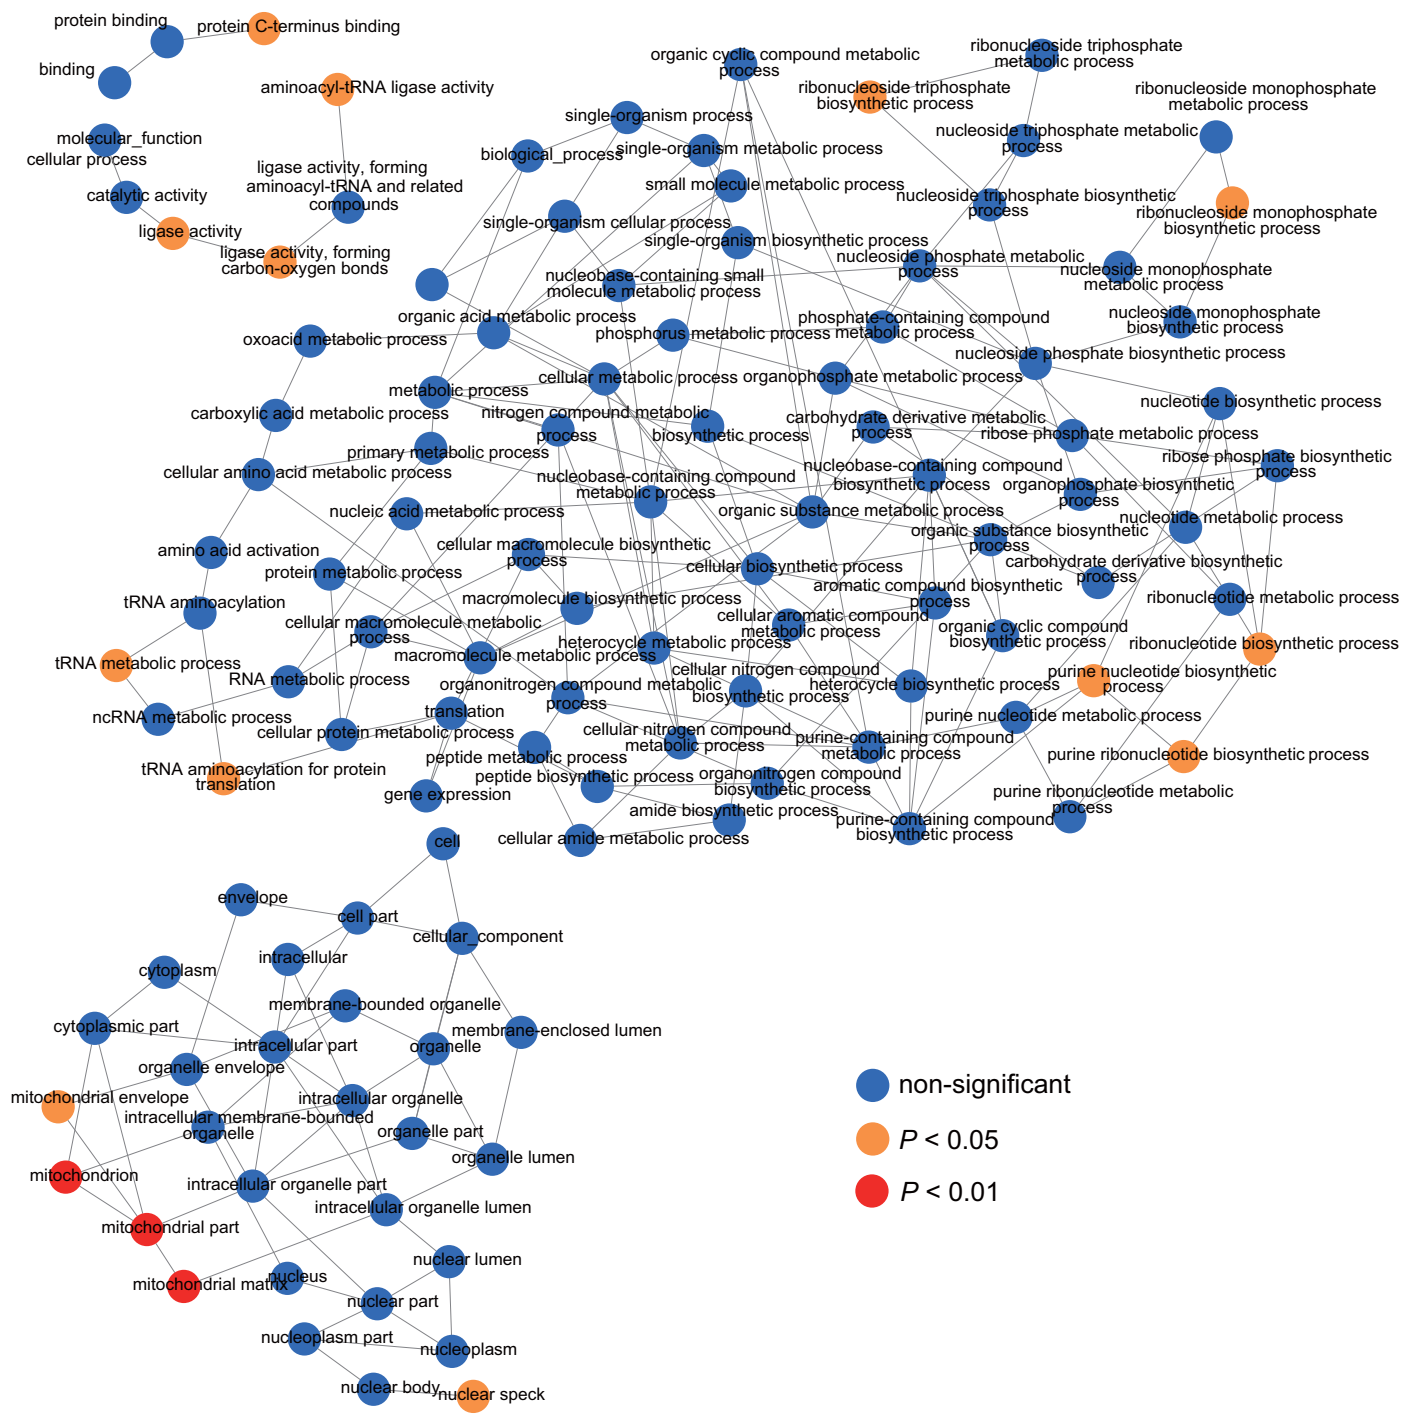

● non-significant  
●  $P < 0.05$   
●  $P < 0.01$
