# Supplementary material for: Protein Lactylation and Metabolic Regulation of the Zoonotic Parasite Toxoplasma gondii
Source: PubMed Central journal article supplement (PMC11082259; doi:10.1016/j.gpb.2022.09.010), 2022-10-07
Supplement: mmc7.pdf [file mmc7.pdf]

Glycolysis/Gluconeogenesis

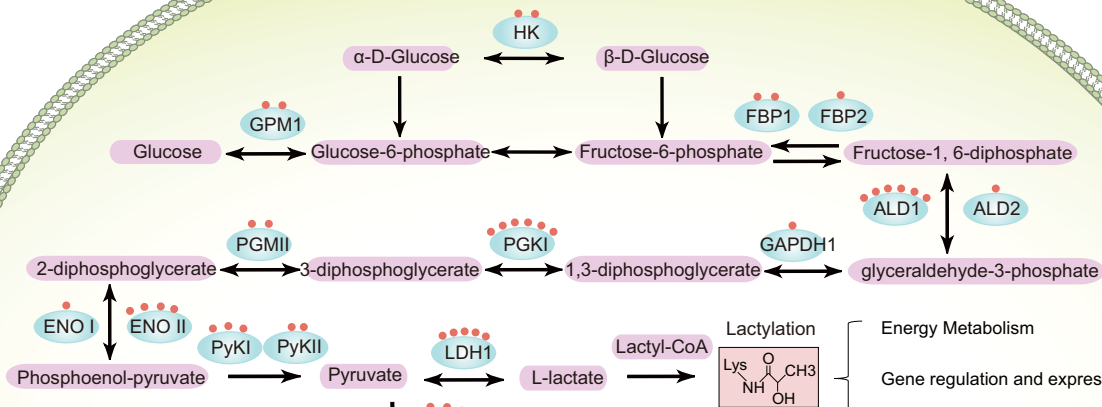

- Energy Metabolism
- Gene regulation and expression
- ... (More Functions)

TCA

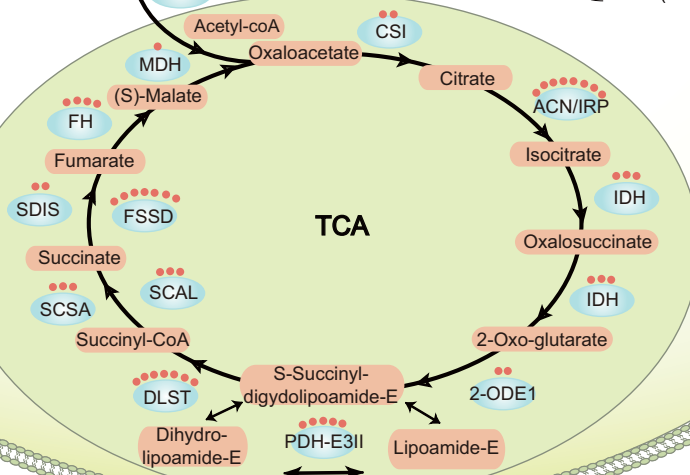

..... Lactylation sites

Regulatory enzyme
