# Supplementary material for: Protein Lactylation and Metabolic Regulation of the Zoonotic Parasite Toxoplasma gondii
Source: PubMed Central journal article supplement (PMC11082259; doi:10.1016/j.gpb.2022.09.010), 2022-10-07

Cluster 4  
Aminoacyl-tRNA biosynthesis

Cluster 3  
Spliceosome

Cluster 2  
Ribosome biogenesis in eukaryotes

Cluster 5  
Carbon metabolism

Cluster 1  
Ribosome

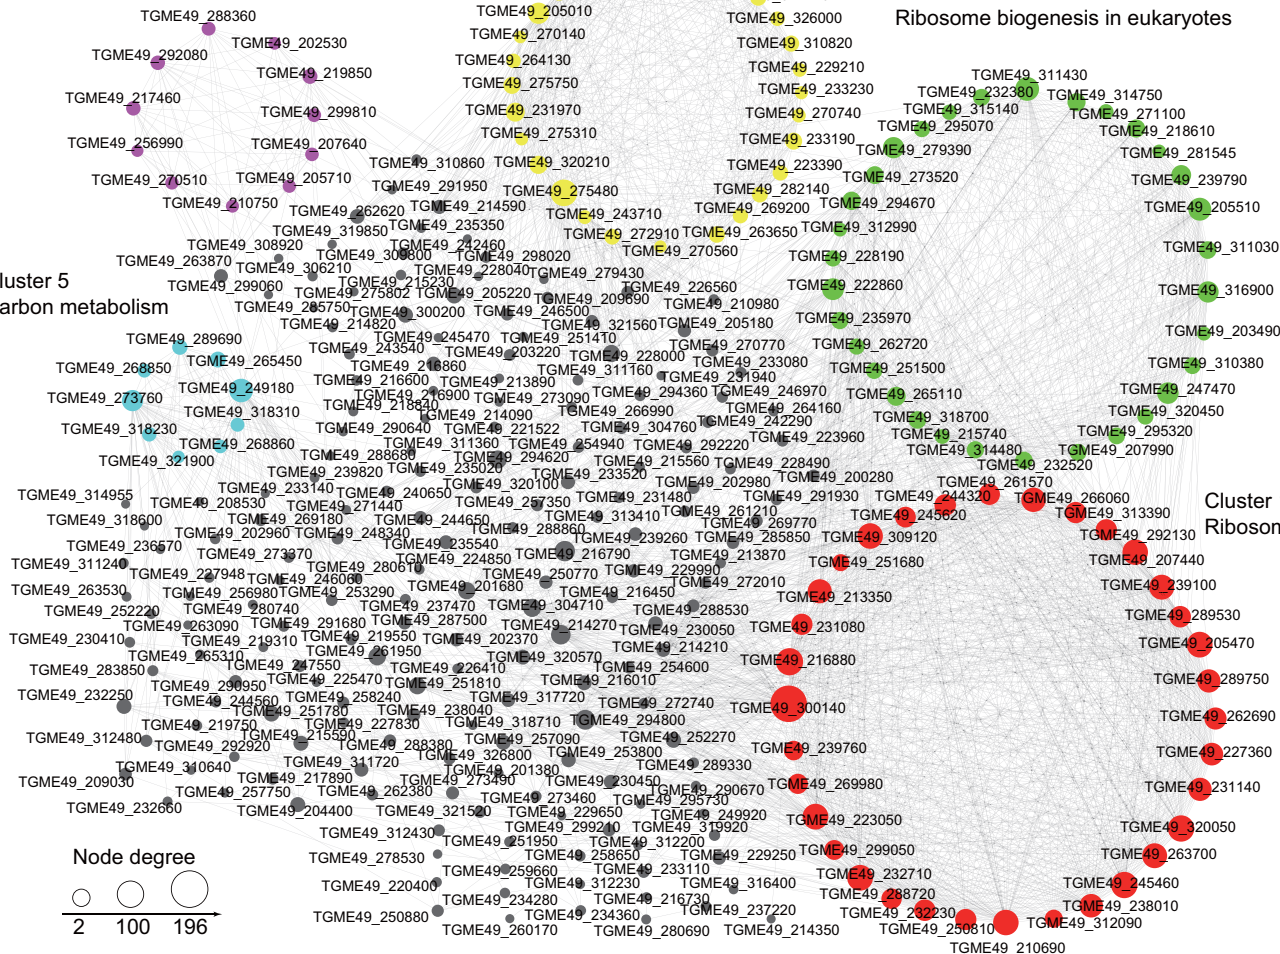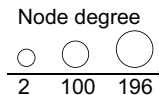

Supplement: mmc8.pdf [file mmc8.pdf]
