# Supplementary material for: Protein Lactylation and Metabolic Regulation of the Zoonotic Parasite Toxoplasma gondii
Source: PubMed Central journal article supplement (PMC11082259; doi:10.1016/j.gpb.2022.09.010), 2022-10-07
Supplement: mmc9.pdf [file mmc9.pdf]

# Snapshot: Histone modifications

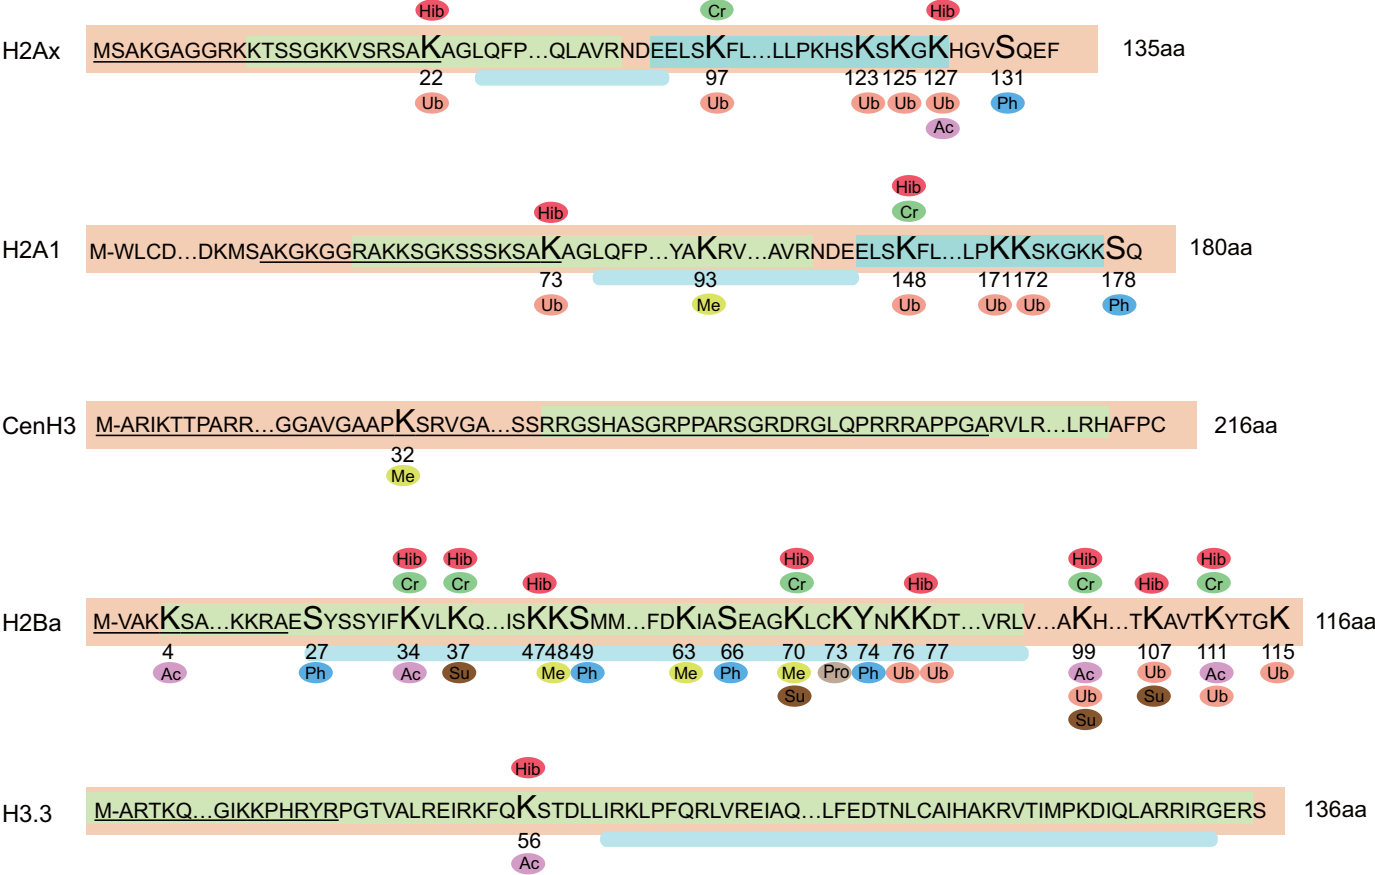

- Pfam: PF00125 (Histone)
- Pfam: PF16211 (Histone\_H2A\_C)
- Pfam: PF15511 (CENP-T\_C)
- Globular domain
- 2-hydroxyisobutyrylation
- Methylation
- Phosphorylation
- Succinylation
- Formylation
- Ubiquitination
- Acetylation
- Oxidation
- Lactylation
- Propionylation
- Crotonylation
