# Supplementary material for: Protein Lactylation and Metabolic Regulation of the Zoonotic Parasite Toxoplasma gondii
Source: PubMed Central journal article supplement (PMC11082259; doi:10.1016/j.gpb.2022.09.010), 2022-10-07

**A**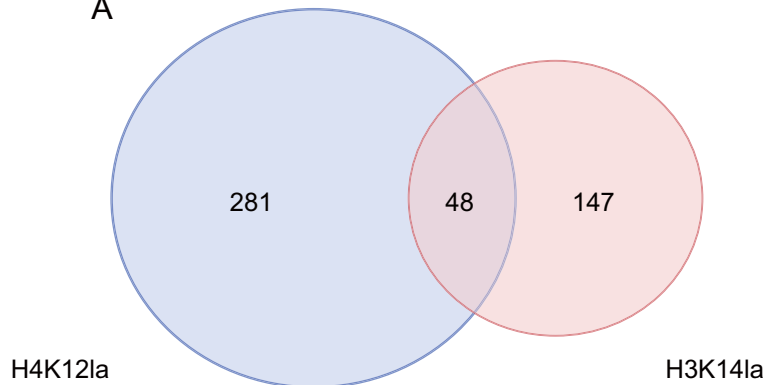**B****H3K14la**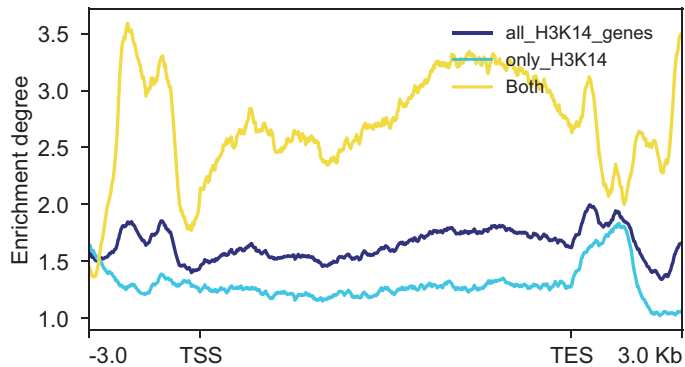**C****H4K12la**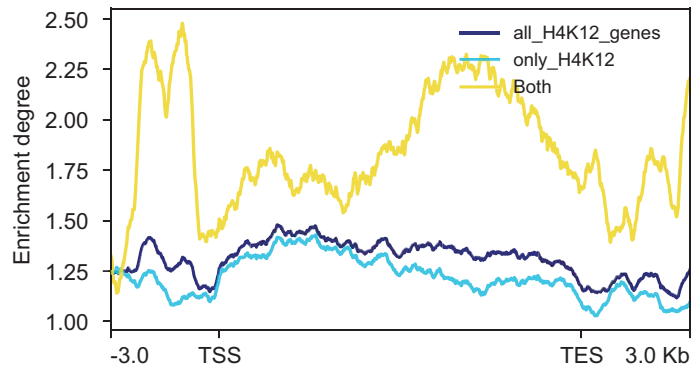

Supplement: mmc12.pdf [file mmc12.pdf]
