# Supplementary material for: Protein Lactylation and Metabolic Regulation of the Zoonotic Parasite Toxoplasma gondii
Source: PubMed Central journal article supplement (PMC11082259; doi:10.1016/j.gpb.2022.09.010), 2022-10-07

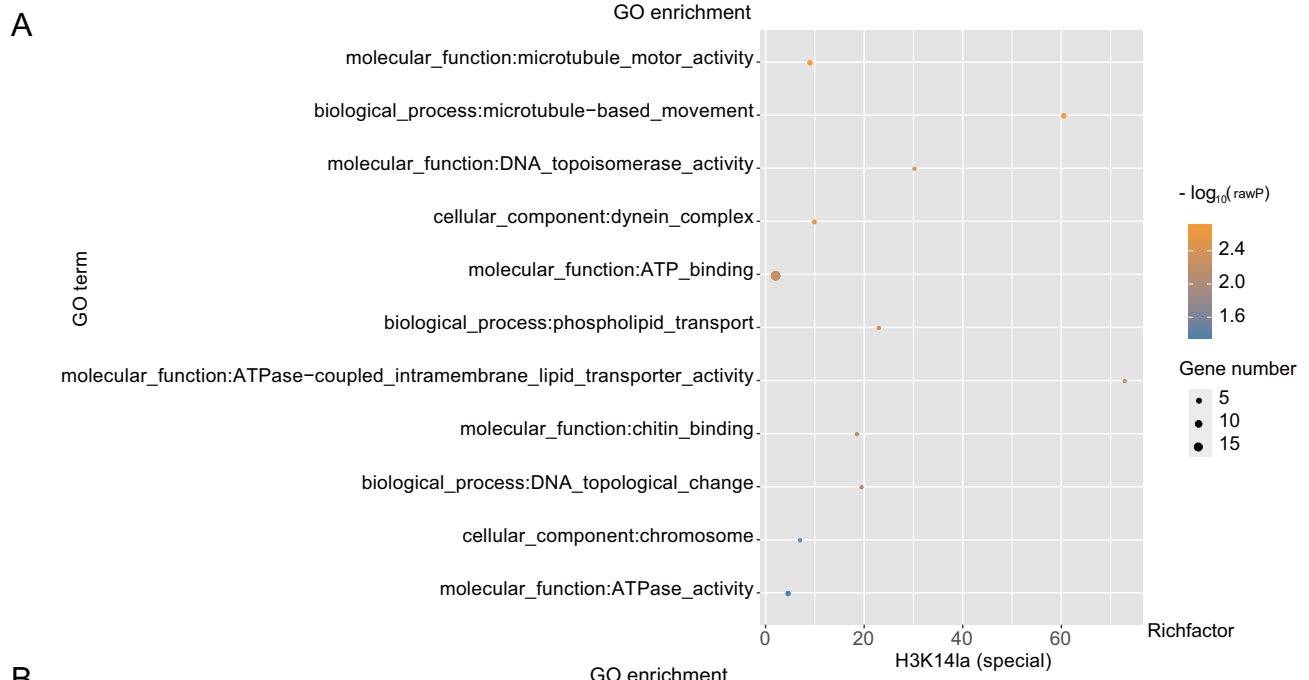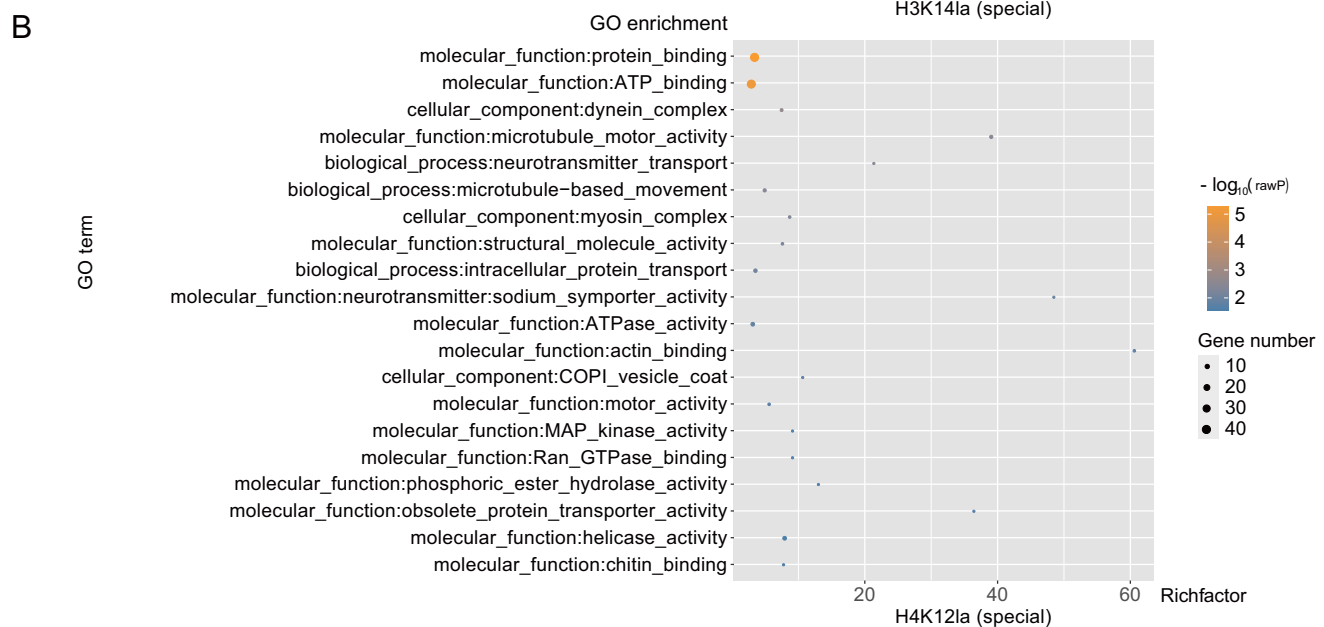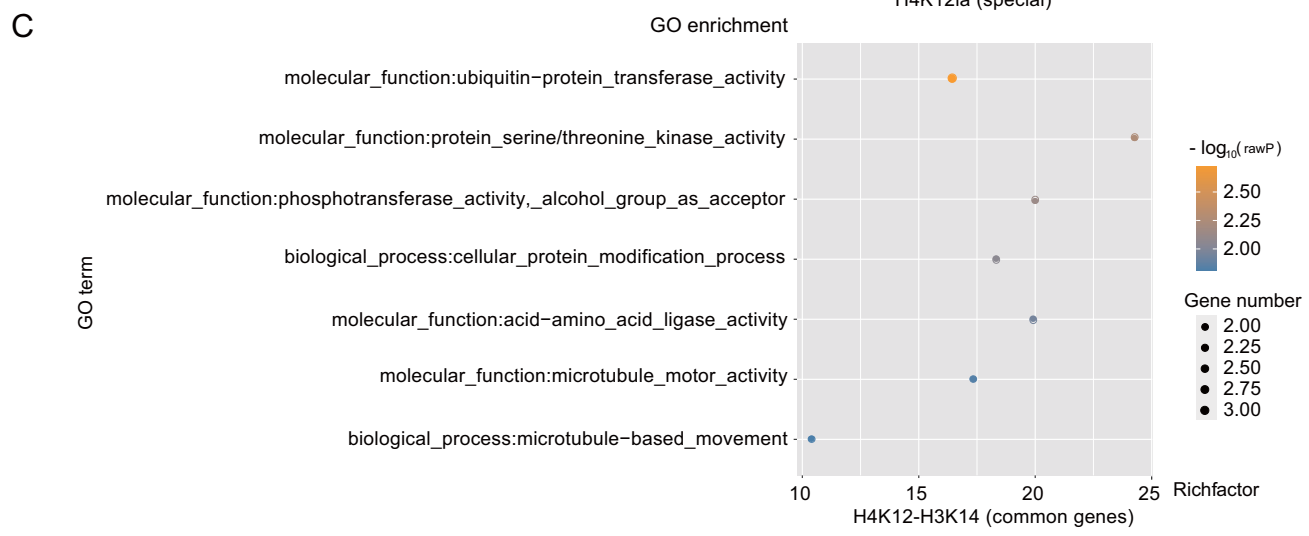

Supplement: mmc13.pdf [file mmc13.pdf]
