# Supplementary material for: Protein Lactylation and Metabolic Regulation of the Zoonotic Parasite Toxoplasma gondii
Source: PubMed Central journal article supplement (PMC11082259; doi:10.1016/j.gpb.2022.09.010), 2022-10-07

A

## Protein domain

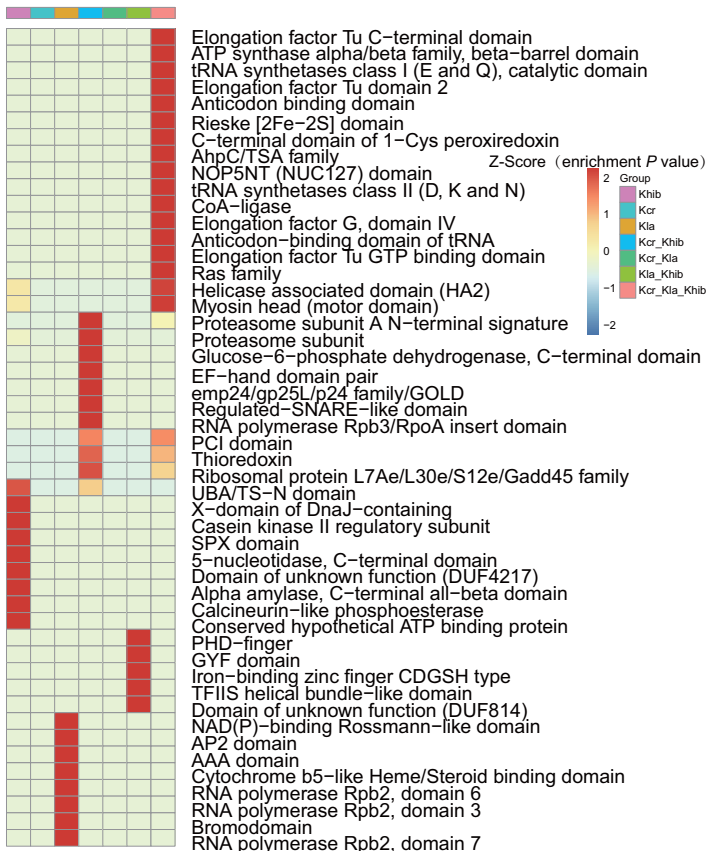

B

## KEGG pathway

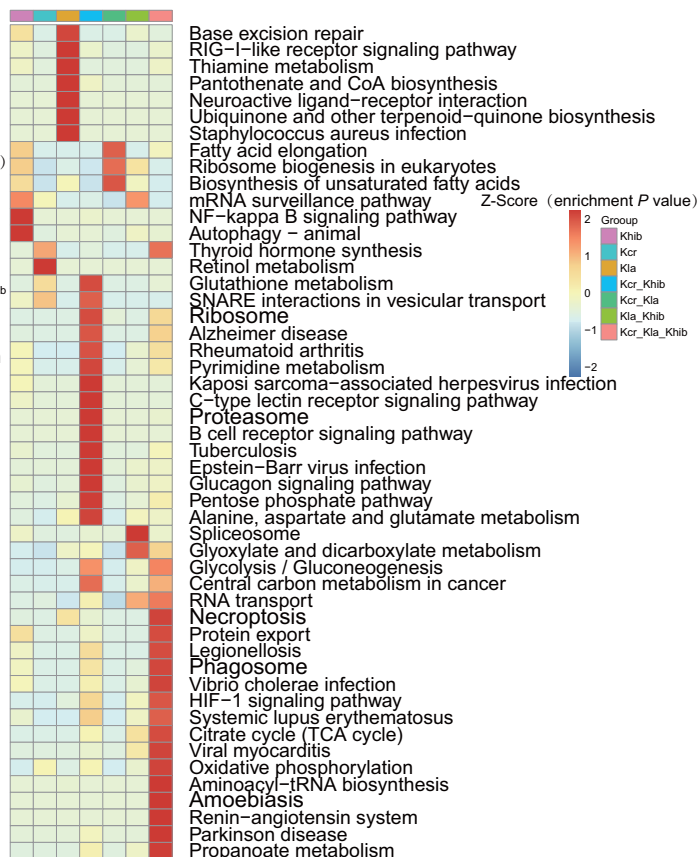

Supplement: mmc22.pdf [file mmc22.pdf]
